# Supplementary material for: Photodegradable hydrogels for external manipulation of cellular microenvironments with real-time monitoring
Source: Royal Society of Chemistry journal article supplement (doi:10.1039/c7ra02629c), 2017-01-01
Supplement: c7ra02629c1.pdf [file c7ra02629c1.pdf]

## Photodegradable Hydrogels for External Manipulation of Cellular

### Microenvironments with Real-time Monitoring

Hanxu Ji<sup>a</sup>, Kai Xi<sup>b</sup>, Qihong Zhang<sup>b</sup> and Xudong Jia<sup>a\*</sup>

Correspondence to: Xudong Jia (E-mail: [jiaxd@nju.edu.cn](mailto:jiaxd@nju.edu.cn))

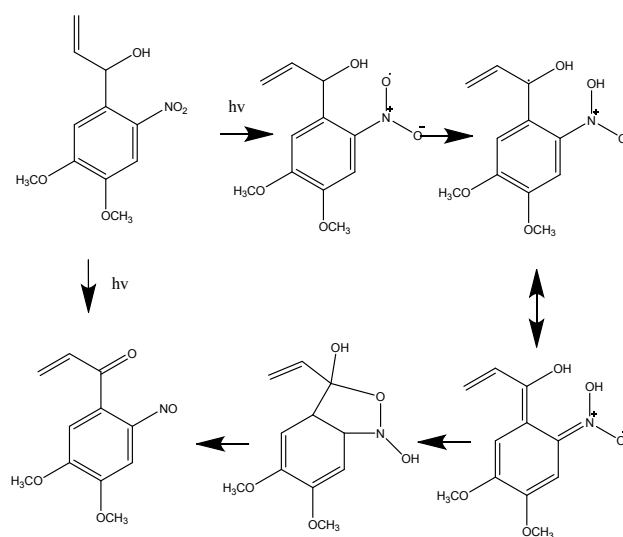

**Figure S1** The mechanism of the structure change of compound **1** under UV light

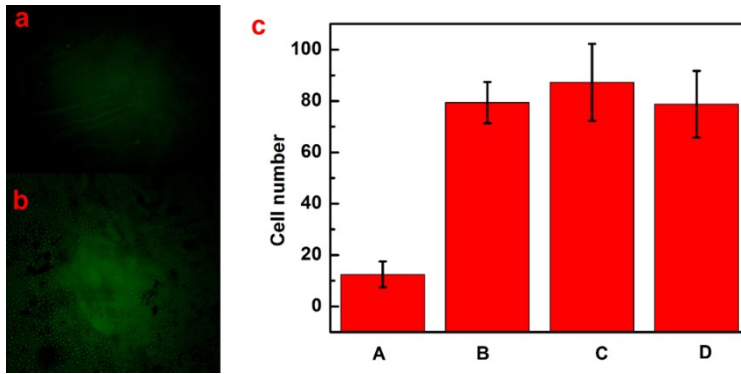

**Figure S2** (a) the spotted hydrogel before A549 cell adhesion (b) the spotted hydrogel after A549 cell adhesion (c) the cell numbers incubated on different place of hydrogels: A: A549 cells on soft area, B: A549 cells on stiff area, C: Hela cells on soft area, D: Hela cells on stiff area.

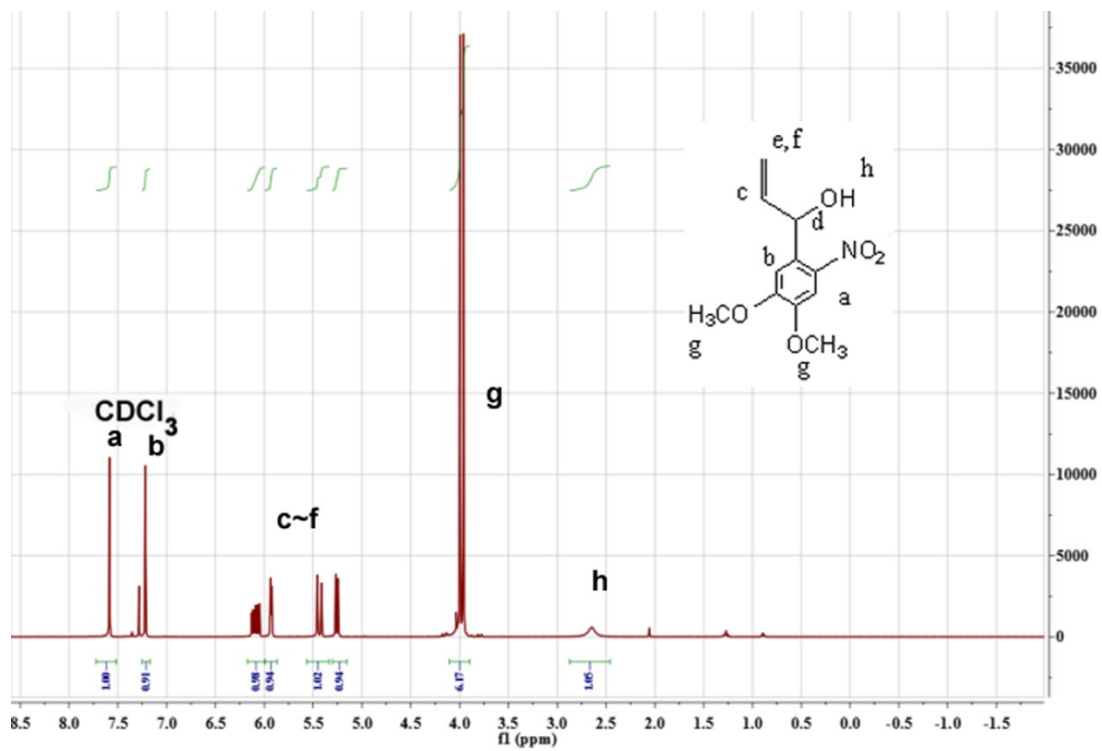

Figure S3 The  $^1\text{H}$  NMR of compound 1

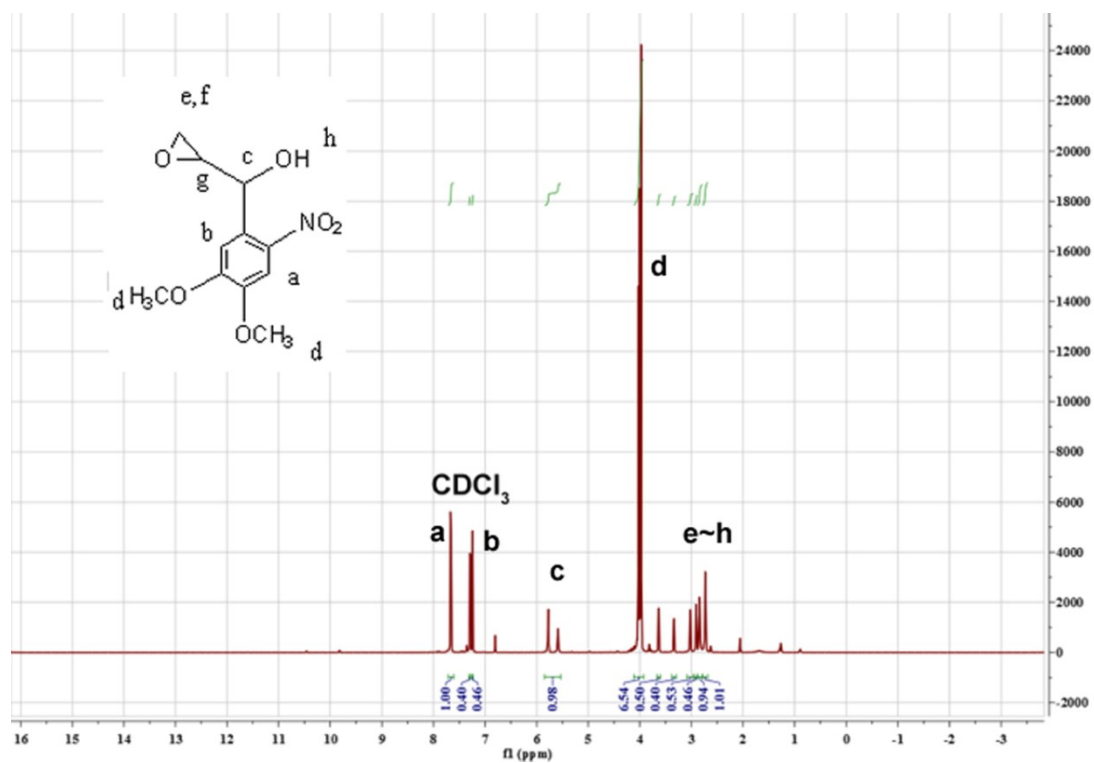

**Figure S4** The  $^1\text{H}$  NMR of compound 2

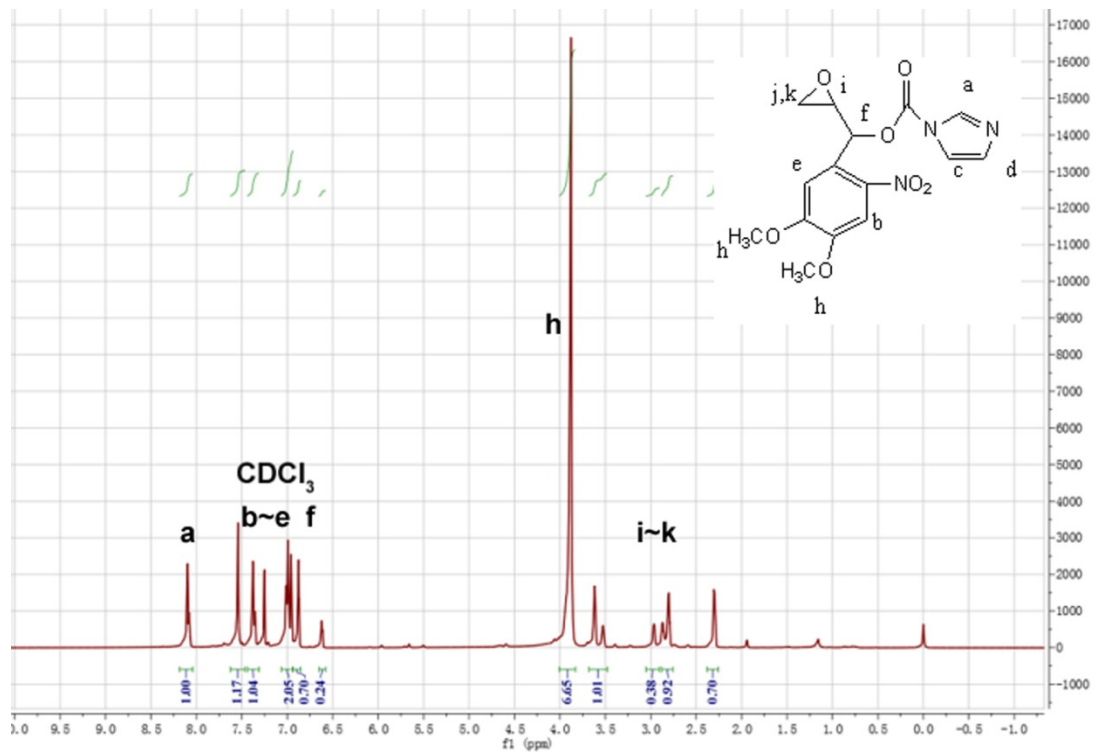

**Figure S5** The  $^1\text{H}$  NMR of compound 3

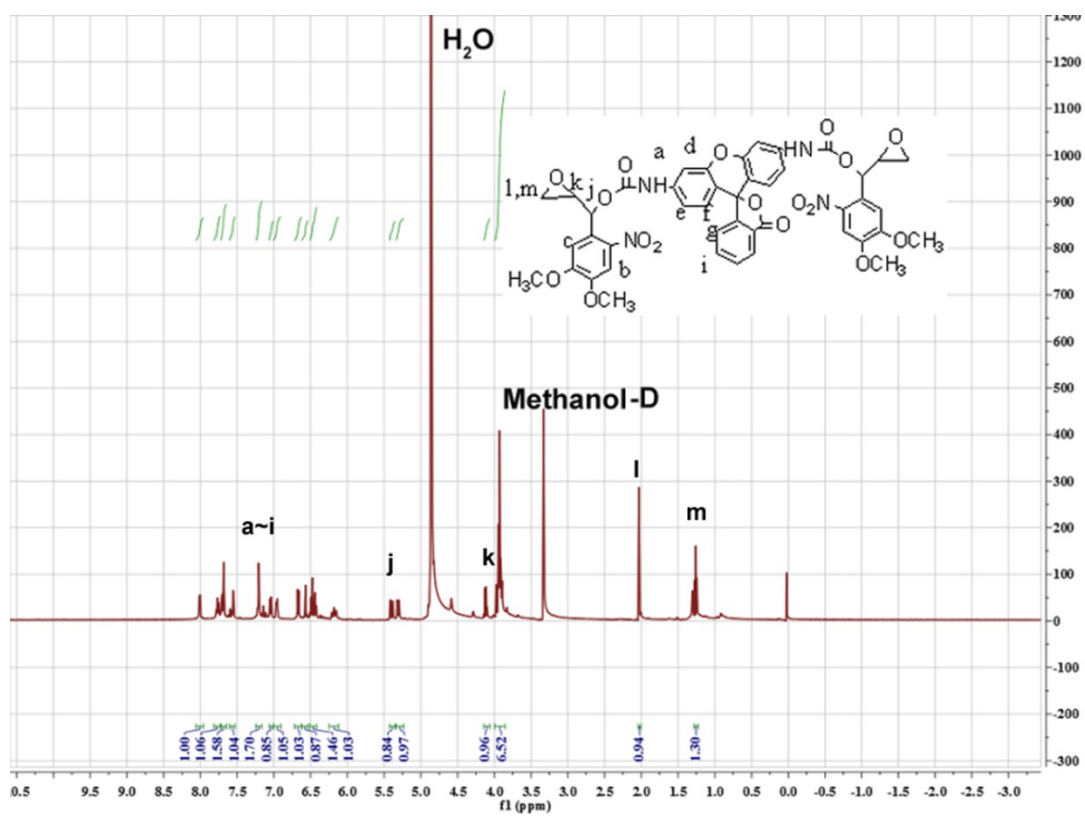

**Figure S6** The  $^1\text{H}$  NMR of compound 4

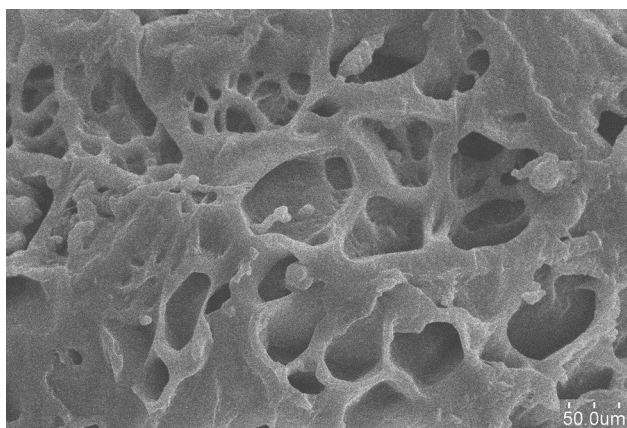

**Figure S7** The SEM picture of hydrogel.

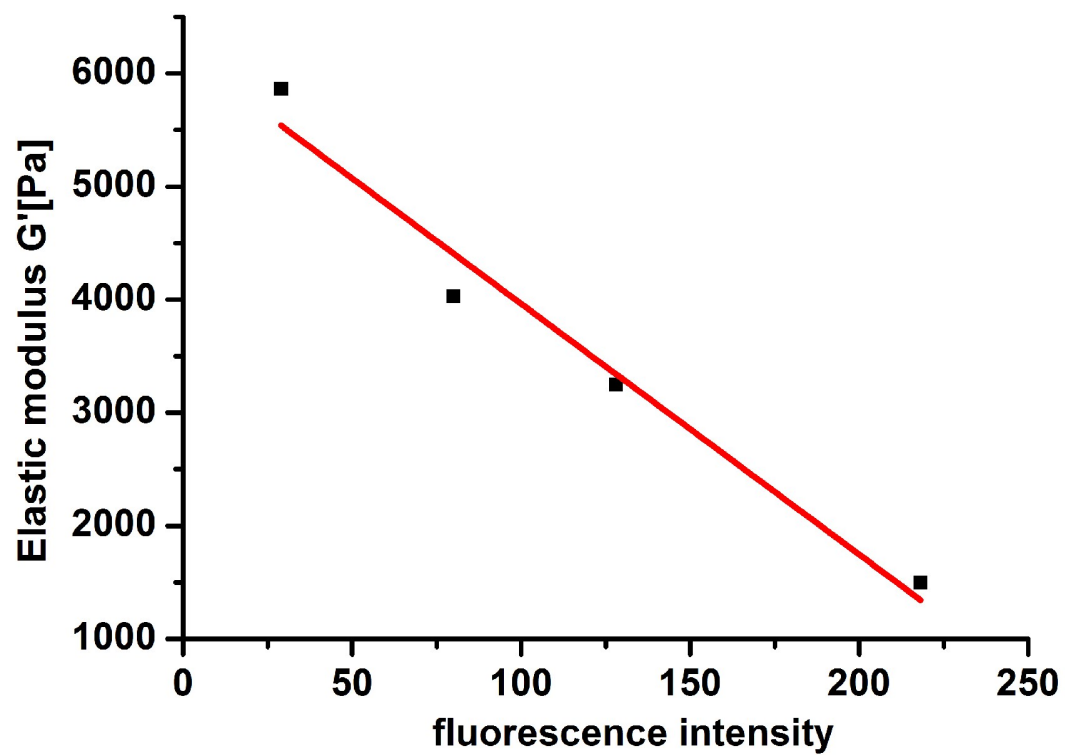

Figure S8 The relationship between the increasing of fluorescence and the decreasing of stiffness of hydrogel.
